# Supplementary material for: Assessing multivariate gene-metabolome associations with rare variants using Bayesian reduced rank regression
Source: PubMed Central journal article supplement — Bioinformatics. 2014 Mar 24;30(14):2026–34. doi: 10.1093/bioinformatics/btu140 (PMC4080737; doi:10.1093/bioinformatics/btu140), 2014-03-24
Supplement: supp_btu140_supplementary_Tables_3_to_8.pdf [file supp_btu140_supplementary_Tables_3_to_8.pdf]

**Supplementary Table 3: Lipoprotein traits.** The table lists the phenotype traits that were included in the analysis. The first column shows the abbreviations of the traits used in the article, and they are the same as in Kettunen et al. (2012).

| Abbreviation | Trait description                                        |
|--------------|----------------------------------------------------------|
| XXL.VLDL.PL  | Phospholipids in chylomicrons and largest VLDL particles |
| XXL.VLDL.L   | Total lipids in chylomicrons and largest VLDL particles  |
| XXL.VLDL.P   | Concentration of chylomicrons and largest VLDL particles |
| XXL.VLDL.TG  | Triglycerides in chylomicrons and largest VLDL particles |
| XL.VLDL.PL   | Phospholipids in very large VLDL                         |
| XL.VLDL.TG   | Triglycerides in very large VLDL                         |
| XL.VLDL.L    | Total lipids in very large VLDL                          |
| XL.VLDL.P    | Concentration of very large VLDL particles               |
| L.VLDL.C     | Total cholesterol in large VLDL                          |
| L.VLDL.FC    | Free cholesterol in large VLDL                           |
| L.VLDL.PL    | Phospholipids in large VLDL                              |
| L.VLDL.TG    | Triglycerides in large VLDL                              |
| L.VLDL.CE    | Cholesterol esters in large VLDL                         |
| L.VLDL.L     | Total lipids in large VLDL                               |
| L.VLDL.P     | Concentration of large VLDL particles                    |
| M.VLDL.C     | Total cholesterol in medium VLDL                         |
| M.VLDL.FC    | Free cholesterol in medium VLDL                          |
| M.VLDL.PL    | Phospholipids in medium VLDL                             |
| M.VLDL.TG    | Triglycerides in medium VLDL                             |
| M.VLDL.CE    | Cholesterol esters in medium VLDL                        |
| M.VLDL.L     | Total lipids in medium VLDL                              |
| M.VLDL.P     | Concentration of medium VLDL particles                   |
| S.VLDL.C     | Total cholesterol in small VLDL                          |
| S.VLDL.FC    | Free cholesterol in small VLDL                           |
| S.VLDL.PL    | Phospholipids in small VLDL                              |
| S.VLDL.TG    | Triglycerides in small VLDL                              |
| S.VLDL.L     | Total lipids in small VLDL                               |
| S.VLDL.P     | Concentration of small VLDL particles                    |
| XS.VLDL.PL   | Phospholipids in very small VLDL                         |
| XS.VLDL.TG   | Triglycerides in very small VLDL                         |
| XS.VLDL.L    | Total lipids in very small VLDL                          |
| XS.VLDL.P    | Concentration of very small VLDL particles               |
| IDL.FC       | Free cholesterol in IDL                                  |
| IDL.PL       | Phospholipids in IDL                                     |
| IDL.L        | Total lipids in IDL                                      |
| IDL.P        | Concentration of IDL particles                           |
| IDL.TG       | Triglycerides in IDL                                     |
| IDL.C        | Total cholesterol in IDL                                 |
| L.LDL.C      | Total cholesterol in large LDL                           |
| L.LDL.FC     | Free cholesterol in large LDL                            |
| L.LDL.PL     | Phospholipids in large LDL                               |

|           |                                           |
|-----------|-------------------------------------------|
| L.LDL.CE  | Cholesterol esters in large LDL           |
| L.LDL.L   | Total lipids in large LDL                 |
| L.LDL.P   | Concentration of large LDL particles      |
| M.LDL.C   | Total cholesterol in medium LDL           |
| M.LDL.PL  | Phospholipids in medium LDL               |
| M.LDL.CE  | Cholesterol esters in medium LDL          |
| M.LDL.L   | Total lipids in medium LDL                |
| M.LDL.P   | Concentration of medium LDL particles     |
| S.LDL.C   | Total cholesterol in small LDL            |
| S.LDL.L   | Total lipids in small LDL                 |
| S.LDL.P   | Concentration of small LDL particles      |
| XL.HDL.C  | Total cholesterol in very large HDL       |
| XL.HDL.FC | Free cholesterol in very large HDL        |
| XL.HDL.PL | Phospholipids in very large HDL           |
| XL.HDL.TG | Triglycerides in very large HDL           |
| XL.HDL.CE | Cholesterol esters in very large HDL      |
| XL.HDL.L  | Total lipids in very large HDL            |
| XL.HDL.P  | Concentration of very large HDL particles |
| L.HDL.C   | Total cholesterol in large HDL            |
| L.HDL.FC  | Free cholesterol in large HDL             |
| L.HDL.PL  | Phospholipids in large HDL                |
| L.HDL.CE  | Cholesterol esters in large HDL           |
| L.HDL.L   | Total lipids in large HDL                 |
| L.HDL.P   | Concentration of large HDL particles      |
| M.HDL.C   | Total cholesterol in medium HDL           |
| M.HDL.FC  | Free cholesterol in medium HDL            |
| M.HDL.PL  | Phospholipids in medium HDL               |
| M.HDL.CE  | Cholesterol esters in medium HDL          |
| M.HDL.L   | Total lipids in medium HDL                |
| M.HDL.P   | Concentration of medium HDL particles     |
| S.HDL.TG  | Triglycerides in small HDL                |
| S.HDL.L   | Total lipids in small HDL                 |
| S.HDL.P   | Concentration of small HDL particles      |

**Supplementary Table 4: Genes with FDR=0.4 from the PTVE method.** The column *q\_val* gives the q-value for the gene, obtained by permutation sampling. The q-value is the expected proportion of false positives if the score of a particular gene was used as the cutoff value for declaring a finding. The column *Ref* gives a reference to a paper in which a genome-wide significant SNP (if any) within 1 Mbp of the gene has been reported. The references are here labeled as [1]: Teslovich et al. (2010), [2]: The Global Lipids Consortium (2013), [3]: Kettunen et al. (2012), association with lipids, [4] Kettunen et al. (2012), association with other metabolites, [5] Inouye et al. (2012) (includes both the novel findings as well as other genes mentioned in the article).

| Rank | Gene        | Chr | q_val | Ref     |
|------|-------------|-----|-------|---------|
| 1.   | LIPC        | 15  | 0     | [1;3;5] |
| 2.   | APOC1       | 19  | 0     | [1;3;5] |
| 3.   | PVRL2       | 19  | 0     | [1;3;5] |
| 4.   | APOB        | 2   | 0     | [1;5]   |
| 5.   | APOA5       | 11  | 0     | [1;3;5] |
| 6.   | APOE        | 19  | 0     | [1;3;5] |
| 7.   | TOMM40      | 19  | 0     | [1;3;5] |
| 8.   | APOC4       | 19  | 0     | [1;3;5] |
| 9.   | APOC4-APOC2 | 19  | 0     | [1;3;5] |
| 10.  | FAM63B      | 15  | 0     | [1;3;5] |
| 11.  | PCIF1       | 20  | 0     | [1;3;5] |
| 12.  | APOC2       | 19  | 0     | [1;3;5] |
| 13.  | PCSK9       | 1   | 0     | [1;3;5] |
| 14.  | USP24       | 1   | 0     | [1;3;5] |
| 15.  | APOA4       | 11  | 0     | [1;3;5] |
| 16.  | PLTP        | 20  | 0     | [1;3;5] |
| 17.  | BUD13       | 11  | 0     | [1;3;5] |
| 18.  | NEURL2      | 20  | 0     | [1;3;5] |
| 19.  | HERPUD1     | 16  | 0     | [1;3;5] |
| 20.  | LDLR        | 19  | 0     | [1;3;5] |
| 21.  | CLPTM1      | 19  | 0     | [1;3;5] |
| 22.  | APOA1       | 11  | 0     | [1;3;5] |
| 23.  | MMP9        | 20  | 0     | [1;3;5] |
| 24.  | ZNF259      | 11  | 0     | [1;3;5] |
| 25.  | CTSA        | 20  | 0     | [1;3;5] |
| 26.  | SLC12A3     | 16  | 0     | [1;3;5] |
| 27.  | ZNF335      | 20  | 0     | [1;3;5] |
| 28.  | CGNL1       | 15  | 0     | [1;3;5] |
| 29.  | BCL3        | 19  | 0     | [1;3;5] |
| 30.  | ZNRD1       | 6   | 0     | [3]     |
| 31.  | ZSWIM3      | 20  | 0     | [1;3;5] |
| 32.  | ZSWIM1      | 20  | 0     | [1;3;5] |
| 33.  | CETP        | 16  | 0     | [1;3;5] |
| 34.  | ZNRD1-AS1   | 6   | 0     | [3]     |
| 35.  | SPATA25     | 20  | 0     | [1;3;5] |
| 36.  | SLC12A5     | 20  | 0     | [1;3;5] |
| 37.  | ADAM10      | 15  | 0.027 | [1;3;5] |
| 38.  | CBLC        | 19  | 0.026 | [1;3;5] |

|     |              |    |       |         |
|-----|--------------|----|-------|---------|
| 39. | SCGB2A2      | 11 | 0.026 | [1;3;5] |
| 40. | KIF6         | 6  | 0.025 | [2]     |
| 41. | LOC100128028 | 20 | 0.049 | [1;3;5] |
| 42. | PPP1R11      | 6  | 0.048 | [3]     |
| 43. | CEACAM16     | 19 | 0.047 | [1;3;5] |
| 44. | XRCC4        | 5  | 0.068 |         |
| 45. | SLTM         | 15 | 0.067 | [1;3;5] |
| 46. | ATPBD4-AS1   | 15 | 0.065 |         |
| 47. | HCG8         | 6  | 0.064 | [3]     |
| 48. | NXN          | 17 | 0.062 |         |
| 49. | DNAH11       | 7  | 0.082 | [1]     |
| 50. | APOC3        | 11 | 0.08  | [1;3;5] |
| 51. | MRPL37       | 1  | 0.078 | [1]     |
| 52. | MYO1E        | 15 | 0.077 | [1;3;5] |
| 53. | CDCP2        | 1  | 0.075 | [1]     |
| 54. | BSND         | 1  | 0.093 | [1;3;5] |
| 55. | ZNF749       | 19 | 0.091 |         |
| 56. | ANGPTL3      | 1  | 0.11  | [1;3;5] |
| 57. | RNF39        | 6  | 0.11  | [3]     |
| 58. | FBXW12       | 3  | 0.12  |         |
| 59. | LOC100507634 | 1  | 0.12  | [1;3;5] |
| 60. | CAMKMT       | 2  | 0.12  | [1]     |
| 61. | ACOT8        | 20 | 0.13  | [1;3;5] |
| 62. | SV2C         | 5  | 0.13  | [1]     |
| 63. | IGL@         | 22 | 0.13  | [1]     |
| 64. | ZNF385B      | 2  | 0.12  |         |
| 65. | SIK3         | 11 | 0.14  | [1;3;5] |
| 66. | TMCO4        | 1  | 0.14  |         |
| 67. | SCPEP1       | 17 | 0.13  |         |
| 68. | MAU2         | 19 | 0.13  | [1]     |
| 69. | C1orf191     | 1  | 0.13  | [1]     |
| 70. | SOX13        | 1  | 0.13  |         |
| 71. | MC1R         | 16 | 0.15  |         |
| 72. | TMEM229B     | 14 | 0.15  |         |
| 73. | SHANK2       | 11 | 0.15  |         |
| 74. | ALDOC        | 17 | 0.18  |         |
| 75. | NCEH1        | 3  | 0.17  |         |
| 76. | IRG1         | 13 | 0.17  |         |
| 77. | LOC100507664 | 1  | 0.17  | [1;3;5] |
| 78. | WWC1         | 5  | 0.18  |         |
| 79. | LPL          | 8  | 0.18  | [1;3;5] |
| 80. | WARS2        | 1  | 0.18  |         |
| 81. | PCDHA@       | 5  | 0.17  |         |
| 82. | SMARCA4      | 19 | 0.17  | [1;3;5] |
| 83. | LOC284661    | 1  | 0.17  |         |
| 84. | ABCA4        | 1  | 0.17  |         |

|      |              |    |      |         |
|------|--------------|----|------|---------|
| 85.  | LRP1B        | 2  | 0.16 |         |
| 86.  | NUP93        | 16 | 0.16 | [1;3;5] |
| 87.  | CYB5RL       | 1  | 0.16 | [1]     |
| 88.  | PDZD2        | 5  | 0.16 |         |
| 89.  | C2orf43      | 2  | 0.17 | [1;5]   |
| 90.  | AKAP6        | 14 | 0.17 |         |
| 91.  | NLRC5        | 16 | 0.16 | [1;3;5] |
| 92.  | CEACAM20     | 19 | 0.16 | [1;3;5] |
| 93.  | C19orf38     | 19 | 0.16 | [1;3;5] |
| 94.  | SP4          | 7  | 0.18 | [1]     |
| 95.  | HNRNPAB      | 5  | 0.18 | [4;5]   |
| 96.  | CEACAM19     | 19 | 0.18 | [1;3;5] |
| 97.  | MARK4        | 19 | 0.18 | [1;3;5] |
| 98.  | LOC100507568 | 15 | 0.18 |         |
| 99.  | LPHN3        | 4  | 0.18 |         |
| 100. | STARD4-AS1   | 5  | 0.19 |         |
| 101. | TM6SF2       | 19 | 0.2  | [1]     |
| 102. | LINC00348    | 13 | 0.2  |         |
| 103. | SUGP1        | 19 | 0.19 | [1]     |
| 104. | LOC100216001 | 10 | 0.2  | [2]     |
| 105. | MIR489       | 7  | 0.2  |         |
| 106. | JDP2         | 14 | 0.22 |         |
| 107. | PRKAR2B      | 7  | 0.21 |         |
| 108. | SPC24        | 19 | 0.21 | [1;3;5] |
| 109. | IRF2BP1      | 19 | 0.21 | [1;3;5] |
| 110. | SIDT2        | 11 | 0.22 | [1;3;5] |
| 111. | KEAP1        | 19 | 0.22 | [1;3;5] |
| 112. | EXOC3L2      | 19 | 0.21 | [1;3;5] |
| 113. | HK1          | 10 | 0.21 |         |
| 114. | CALCR        | 7  | 0.23 |         |
| 115. | RASGRF2      | 5  | 0.23 |         |
| 116. | MYBPHL       | 1  | 0.22 | [1]     |
| 117. | SGPP2        | 2  | 0.24 |         |
| 118. | LOC100506810 | 1  | 0.24 | [1]     |
| 119. | GABRB3       | 15 | 0.24 |         |
| 120. | LOC100287314 | 12 | 0.25 |         |
| 121. | VIT          | 2  | 0.25 |         |
| 122. | LOC100506530 | 15 | 0.25 |         |
| 123. | GCFC1-AS1    | 21 | 0.24 |         |
| 124. | ADAMTS3      | 4  | 0.24 | [3;5]   |
| 125. | RAPGEF6      | 5  | 0.24 |         |
| 126. | PRKG1        | 10 | 0.24 |         |
| 127. | LOC100293962 | 12 | 0.24 |         |
| 128. | PCDHA7       | 5  | 0.24 |         |
| 129. | MIR581       | 5  | 0.26 | [1]     |
| 130. | GCNT2        | 6  | 0.26 | [5]     |

|      |              |    |      |           |
|------|--------------|----|------|-----------|
| 131. | PPARGC1A     | 4  | 0.27 |           |
| 132. | FAM117A      | 17 | 0.3  |           |
| 133. | SSBP3        | 1  | 0.32 | [1]       |
| 134. | DTNA         | 18 | 0.31 |           |
| 135. | HAPLN4       | 19 | 0.32 | [1]       |
| 136. | LINC00460    | 13 | 0.32 |           |
| 137. | SLC28A1      | 15 | 0.32 |           |
| 138. | DTNB         | 2  | 0.33 |           |
| 139. | HAS2         | 8  | 0.33 |           |
| 140. | SLC26A4      | 7  | 0.34 |           |
| 141. | NCAM1        | 11 | 0.34 |           |
| 142. | MIR4422      | 1  | 0.35 | [1;3;5]   |
| 143. | SYNJ1        | 21 | 0.35 |           |
| 144. | CMTM7        | 3  | 0.35 | [2]       |
| 145. | PIGS         | 17 | 0.35 |           |
| 146. | DNA2         | 10 | 0.35 |           |
| 147. | SPIRE2       | 16 | 0.35 |           |
| 148. | GPX4         | 19 | 0.34 |           |
| 149. | MTF2         | 1  | 0.34 | [1]       |
| 150. | FLJ45743     | 18 | 0.35 |           |
| 151. | MIR199A1     | 19 | 0.34 | [1;3;5]   |
| 152. | C21orf59     | 21 | 0.34 |           |
| 153. | FOXM1        | 17 | 0.35 |           |
| 154. | COL23A1      | 5  | 0.34 | [4;5]     |
| 155. | DSCAML1      | 11 | 0.34 | [1;2;3;5] |
| 156. | FNDC4        | 2  | 0.34 | [1;4;5]   |
| 157. | ECT2         | 3  | 0.34 |           |
| 158. | ASRGL1       | 11 | 0.34 | [1;3;5]   |
| 159. | SLC26A4-AS1  | 7  | 0.33 |           |
| 160. | PCDHA8       | 5  | 0.33 |           |
| 161. | MBOAT1       | 6  | 0.33 |           |
| 162. | HAS2-AS1     | 8  | 0.33 |           |
| 163. | MTHFD2L      | 4  | 0.33 | [5]       |
| 164. | ETNK2        | 1  | 0.34 |           |
| 165. | C15orf53     | 15 | 0.33 |           |
| 166. | BCR          | 22 | 0.33 |           |
| 167. | C8orf56      | 8  | 0.34 |           |
| 168. | KCNK17       | 6  | 0.33 | [2]       |
| 169. | GC           | 4  | 0.33 | [3;5]     |
| 170. | MTUS1        | 8  | 0.34 | [1]       |
| 171. | CTAGE5       | 14 | 0.33 |           |
| 172. | MIR2467      | 2  | 0.34 |           |
| 173. | AGXT2L2      | 5  | 0.34 | [4;5]     |
| 174. | IRF2         | 4  | 0.33 |           |
| 175. | LOC100131510 | 2  | 0.33 |           |
| 176. | PRRX2        | 9  | 0.33 |           |

|      |               |    |      |         |
|------|---------------|----|------|---------|
| 177. | NBLA00301     | 4  | 0.37 |         |
| 178. | HBP1          | 7  | 0.37 |         |
| 179. | SCGB1D4       | 11 | 0.36 | [1;3;5] |
| 180. | SMARCA2       | 9  | 0.36 | [2]     |
| 181. | PPBP          | 4  | 0.36 | [5]     |
| 182. | TCTE3         | 6  | 0.36 |         |
| 183. | DMRT1         | 9  | 0.36 |         |
| 184. | C1orf151-NBL1 | 1  | 0.36 |         |
| 185. | LAPTM4B       | 8  | 0.36 |         |
| 186. | PLXNC1        | 12 | 0.36 |         |
| 187. | STRN          | 2  | 0.36 |         |
| 188. | MIR4531       | 19 | 0.36 | [1;3;5] |
| 189. | ANKRD55       | 5  | 0.35 | [1]     |
| 190. | ZNF431        | 19 | 0.35 |         |
| 191. | SPAG5         | 17 | 0.36 |         |
| 192. | ZDHHC21       | 9  | 0.35 | [1]     |
| 193. | PHOSPHO1      | 17 | 0.35 |         |
| 194. | PVR           | 19 | 0.35 | [1;3;5] |
| 195. | CMTM8         | 3  | 0.35 | [2]     |
| 196. | BRI3BP        | 12 | 0.37 | [1]     |
| 197. | KCTD14        | 11 | 0.37 |         |
| 198. | GRID1         | 10 | 0.36 |         |
| 199. | PSORS1C1      | 6  | 0.36 |         |
| 200. | LOC101059966  | 8  | 0.36 | [1]     |
| 201. | STK11         | 19 | 0.36 |         |
| 202. | OR13C4        | 9  | 0.36 | [1;3;5] |
| 203. | LOC100169752  | 10 | 0.35 |         |
| 204. | EEF2K         | 16 | 0.36 |         |
| 205. | LDHAL6B       | 15 | 0.37 | [1;3;5] |
| 206. | TIGD2         | 4  | 0.36 | [2;4;5] |
| 207. | UNC119        | 17 | 0.38 |         |
| 208. | CCDC144NL     | 17 | 0.38 |         |
| 209. | PTPRD         | 9  | 0.37 |         |
| 210. | GOLPH3        | 5  | 0.37 |         |
| 211. | GLDN          | 15 | 0.37 |         |
| 212. | MYPOP         | 19 | 0.37 | [1;3;5] |
| 213. | CER1          | 9  | 0.37 | [1]     |
| 214. | PCDHA3        | 5  | 0.37 |         |
| 215. | ICA1          | 7  | 0.37 |         |
| 216. | AQP9          | 15 | 0.37 | [1;3;5] |
| 217. | TCF25         | 16 | 0.37 |         |
| 218. | NEDD4L        | 18 | 0.37 |         |
| 219. | IFT172        | 2  | 0.37 | [1;4;5] |
| 220. | TAC4          | 17 | 0.37 |         |
| 221. | LOC100506795  | 1  | 0.38 | [1]     |
| 222. | ENAM          | 4  | 0.37 |         |

|      |              |    |      |         |
|------|--------------|----|------|---------|
| 223. | CXCL5        | 4  | 0.37 | [5]     |
| 224. | FAM204A      | 10 | 0.38 |         |
| 225. | MCC          | 5  | 0.37 |         |
| 226. | TAGLN        | 11 | 0.37 | [1;3;5] |
| 227. | FBXO42       | 1  | 0.38 |         |
| 228. | LOC400756    | 1  | 0.38 | [1;3;5] |
| 229. | CCNB2        | 15 | 0.38 | [1;3;5] |
| 230. | TMEM252      | 9  | 0.38 |         |
| 231. | ABCG8        | 2  | 0.38 | [1]     |
| 232. | RAP1GAP2     | 17 | 0.38 |         |
| 233. | ITGBL1       | 13 | 0.38 |         |
| 234. | AACS         | 12 | 0.38 | [1]     |
| 235. | LSM14B       | 20 | 0.38 |         |
| 236. | LOC100507362 | 6  | 0.38 | [3]     |
| 237. | CXCL2        | 4  | 0.38 | [5]     |
| 238. | SPINT4       | 20 | 0.38 | [1;3;5] |
| 239. | RBFOX1       | 16 | 0.38 |         |
| 240. | GLCE         | 15 | 0.38 |         |
| 241. | GMIP         | 19 | 0.38 | [1]     |
| 242. | LOC100288846 | 14 | 0.38 |         |
| 243. | RPS17L       | 15 | 0.38 |         |
| 244. | GCKR         | 2  | 0.39 | [1;4;5] |
| 245. | LOC100128563 | 2  | 0.38 |         |
| 246. | UBE2C        | 20 | 0.39 | [1;3;5] |
| 247. | NREP-AS1     | 5  | 0.39 |         |
| 248. | FSTL4        | 5  | 0.39 |         |
| 249. | SLC35B1      | 17 | 0.39 |         |
| 250. | PBX4         | 19 | 0.38 | [1]     |
| 251. | AHNAK        | 11 | 0.38 | [1;3;5] |
| 252. | RNF150       | 4  | 0.38 |         |
| 253. | MAGI1        | 3  | 0.38 |         |
| 254. | SLFN12L      | 17 | 0.38 |         |
| 255. | LCP2         | 5  | 0.38 |         |
| 256. | LINC00159    | 21 | 0.38 |         |
| 257. | MDH1B        | 2  | 0.38 |         |
| 258. | HAND2        | 4  | 0.39 |         |
| 259. | DOCK1        | 10 | 0.39 |         |
| 260. | PF4          | 4  | 0.39 | [5]     |
| 261. | SORT1        | 1  | 0.39 | [1]     |
| 262. | FAM49B       | 8  | 0.39 |         |
| 263. | CDH13        | 16 | 0.38 |         |
| 264. | BCAM         | 19 | 0.39 | [1;3;5] |
| 265. | HNRNPM       | 19 | 0.39 | [1]     |
| 266. | CUBN         | 10 | 0.39 | [2]     |
| 267. | ZNF295       | 21 | 0.39 |         |
| 268. | SLC25A18     | 22 | 0.39 |         |

|      |              |    |      |         |
|------|--------------|----|------|---------|
| 269. | SLC44A3      | 1  | 0.39 |         |
| 270. | LRPPRC       | 2  | 0.39 | [1]     |
| 271. | CXCL3        | 4  | 0.39 | [5]     |
| 272. | LOC440934    | 2  | 0.39 |         |
| 273. | ATP10A       | 15 | 0.39 |         |
| 274. | MINOS1       | 1  | 0.39 |         |
| 275. | TET1         | 10 | 0.39 |         |
| 276. | CTNNA2       | 2  | 0.38 |         |
| 277. | SBNO2        | 19 | 0.39 |         |
| 278. | CCDC41       | 12 | 0.38 |         |
| 279. | OXTR         | 3  | 0.39 |         |
| 280. | POU5F1       | 6  | 0.39 |         |
| 281. | ZNF285       | 19 | 0.38 | [1;3;5] |
| 282. | UBA5         | 3  | 0.38 | [2]     |
| 283. | FOS          | 14 | 0.39 |         |
| 284. | SCGB1D2      | 11 | 0.38 | [1;3;5] |
| 285. | GRIN2B       | 12 | 0.38 |         |
| 286. | LOC100652768 | 11 | 0.38 | [1;3;5] |
| 287. | TRNAL7       | 16 | 0.38 |         |
| 288. | TBX15        | 1  | 0.38 |         |
| 289. | NCAN         | 19 | 0.38 | [1]     |
| 290. | C2CD2        | 21 | 0.38 |         |
| 291. | CNTNAP5      | 2  | 0.37 |         |
| 292. | LOC339298    | 18 | 0.37 |         |
| 293. | ALDH5A1      | 6  | 0.38 |         |
| 294. | LRRC28       | 15 | 0.38 |         |
| 295. | FLJ45513     | 17 | 0.38 |         |
| 296. | LOC100505474 | 18 | 0.39 |         |
| 297. | ST6GALNAC3   | 1  | 0.39 |         |
| 298. | NRXN3        | 14 | 0.39 |         |
| 299. | BDH1         | 3  | 0.39 |         |
| 300. | DOCK3        | 3  | 0.39 | [2]     |
| 301. | CAMK2D       | 4  | 0.39 |         |
| 302. | CR2          | 1  | 0.39 |         |
| 303. | C19orf35     | 19 | 0.39 |         |
| 304. | MIR640       | 19 | 0.39 | [1]     |
| 305. | LOC100507224 | 3  | 0.4  |         |

**Supplementary Table 5: Genes with FDR=0.4 from the PTVE-rare method**

| <b>Rank</b> | <b>Gene</b>  | <b>Chr</b> | <b>q_val</b> | <b>Ref</b> |
|-------------|--------------|------------|--------------|------------|
| 1.          | ZNF749       | 19         | 0            |            |
| 2.          | MC1R         | 16         | 0            |            |
| 3.          | LRP1B        | 2          | 0            |            |
| 4.          | LOC100506530 | 15         | 0.25         |            |
| 5.          | SPIRE2       | 16         | 0.2          |            |
| 6.          | XRCC4        | 5          | 0.17         |            |

**Supplementary Table 6: Genes with FDR=0.4 from the single SNP CCA method.**

| <b>Rank</b> | <b>Gene</b>  | <b>Chr</b> | <b>q_val</b> | <b>Ref</b> |
|-------------|--------------|------------|--------------|------------|
| 1.          | NTRK3        | 15         | 0            |            |
| 2.          | ZNF416       | 19         | 0            |            |
| 3.          | ZNF773       | 19         | 0            |            |
| 4.          | ZNF549       | 19         | 0            |            |
| 5.          | ZIK1         | 19         | 0            |            |
| 6.          | ZNF550       | 19         | 0            |            |
| 7.          | ZNF530       | 19         | 0            |            |
| 8.          | ZNF207       | 17         | 0.38         |            |
| 9.          | LOC101060080 | 17         | 0.33         |            |
| 10.         | PSMD11       | 17         | 0.3          |            |
| 11.         | ME3          | 11         | 0.33         |            |

**Supplementary Table 7: Genes with FDR=0.4 from the pairwise method**

| Rank | Gene         | Chr | q_val | Ref     |
|------|--------------|-----|-------|---------|
| 1.   | LIPC         | 15  | 0     | [1;3;5] |
| 2.   | PPP1R11      | 6   | 0     | [3]     |
| 3.   | ZNRD1        | 6   | 0     | [3]     |
| 4.   | HCG8         | 6   | 0     | [3]     |
| 5.   | ZNRD1-AS1    | 6   | 0     | [3]     |
| 6.   | RNF39        | 6   | 0     | [3]     |
| 7.   | ADAM10       | 15  | 0     | [1;3;5] |
| 8.   | APOC1        | 19  | 0     | [1;3;5] |
| 9.   | PVRL2        | 19  | 0     | [1;3;5] |
| 10.  | APOE         | 19  | 0     | [1;3;5] |
| 11.  | TOMM40       | 19  | 0     | [1;3;5] |
| 12.  | APOC4        | 19  | 0     | [1;3;5] |
| 13.  | APOC4-APOC2  | 19  | 0     | [1;3;5] |
| 14.  | APOC2        | 19  | 0     | [1;3;5] |
| 15.  | CLPTM1       | 19  | 0     | [1;3;5] |
| 16.  | HERPUD1      | 16  | 0     | [1;3;5] |
| 17.  | SLC12A3      | 16  | 0     | [1;3;5] |
| 18.  | CETP         | 16  | 0     | [1;3;5] |
| 19.  | USP24        | 1   | 0     | [1;3;5] |
| 20.  | SLTM         | 15  | 0     | [1;3;5] |
| 21.  | RNF111       | 15  | 0     | [1;3;5] |
| 22.  | MYO1E        | 15  | 0     | [1;3;5] |
| 23.  | LDHAL6B      | 15  | 0     | [1;3;5] |
| 24.  | MIR2116      | 15  | 0     | [1;3;5] |
| 25.  | CCNB2        | 15  | 0     | [1;3;5] |
| 26.  | APOA5        | 11  | 0     | [1;3;5] |
| 27.  | APOA4        | 11  | 0     | [1;3;5] |
| 28.  | BUD13        | 11  | 0     | [1;3;5] |
| 29.  | ZNF259       | 11  | 0     | [1;3;5] |
| 30.  | PCIF1        | 20  | 0     | [1;3;5] |
| 31.  | NEURL2       | 20  | 0     | [1;3;5] |
| 32.  | CTSA         | 20  | 0     | [1;3;5] |
| 33.  | ZNF335       | 20  | 0     | [1;3;5] |
| 34.  | ZSWIM1       | 20  | 0     | [1;3;5] |
| 35.  | SPATA25      | 20  | 0     | [1;3;5] |
| 36.  | PLTP         | 20  | 0     | [1;3;5] |
| 37.  | ZSWIM3       | 20  | 0     | [1;3;5] |
| 38.  | FAM63B       | 15  | 0     | [1;3;5] |
| 39.  | LOC100507634 | 1   | 0     | [1;3;5] |
| 40.  | ACOT8        | 20  | 0     | [1;3;5] |
| 41.  | MMP9         | 20  | 0     | [1;3;5] |
| 42.  | NLRC5        | 16  | 0     | [1;3;5] |
| 43.  | AQP9         | 15  | 0     | [1;3;5] |
| 44.  | FAM81A       | 15  | 0     | [5]     |

|     |              |    |   |         |
|-----|--------------|----|---|---------|
| 45. | APOB         | 2  | 0 | [1;5]   |
| 46. | APOC3        | 11 | 0 | [1;3;5] |
| 47. | APOA1        | 11 | 0 | [1;3;5] |
| 48. | LOC100507652 | 1  | 0 | [1;3;5] |
| 49. | LDLR         | 19 | 0 | [1;3;5] |
| 50. | SMARCA4      | 19 | 0 | [1;3;5] |
| 51. | CBLC         | 19 | 0 | [1;3;5] |
| 52. | BCAM         | 19 | 0 | [1;3;5] |
| 53. | ADAMTS3      | 4  | 0 | [3;5]   |
| 54. | HNF4A        | 20 | 0 | [1]     |
| 55. | MIR3646      | 20 | 0 | [1]     |
| 56. | PPBP         | 4  | 0 | [5]     |
| 57. | PF4          | 4  | 0 | [5]     |
| 58. | CXCL5        | 4  | 0 | [5]     |
| 59. | CXCL3        | 4  | 0 | [5]     |
| 60. | PCSK9        | 1  | 0 | [1;3;5] |
| 61. | BSND         | 1  | 0 | [1;3;5] |
| 62. | TMEM61       | 1  | 0 | [1;3;5] |
| 63. | MRPL37       | 1  | 0 | [1]     |
| 64. | CYB5RL       | 1  | 0 | [1]     |
| 65. | SSBP3        | 1  | 0 | [1]     |
| 66. | CDCP2        | 1  | 0 | [1]     |
| 67. | C1orf191     | 1  | 0 | [1]     |
| 68. | UBE2C        | 20 | 0 | [1;3;5] |
| 69. | WFDC3        | 20 | 0 | [1;3;5] |
| 70. | DNTTIP1      | 20 | 0 | [1;3;5] |
| 71. | SNX21        | 20 | 0 | [1;3;5] |
| 72. | TNNC2        | 20 | 0 | [1;3;5] |
| 73. | MAU2         | 19 | 0 | [1]     |
| 74. | TM6SF2       | 19 | 0 | [1]     |
| 75. | SUGP1        | 19 | 0 | [1]     |
| 76. | HAPLN4       | 19 | 0 | [1]     |
| 77. | NCAN         | 19 | 0 | [1]     |
| 78. | SLC12A5      | 20 | 0 | [1;3;5] |
| 79. | LOC100128028 | 20 | 0 | [1;3;5] |
| 80. | NCOA5        | 20 | 0 | [1;3;5] |
| 81. | GP1BA        | 17 | 0 | [5]     |
| 82. | SLC25A11     | 17 | 0 | [5]     |
| 83. | CAMTA2       | 17 | 0 | [5]     |
| 84. | MINK1        | 17 | 0 | [5]     |
| 85. | SPAG7        | 17 | 0 | [5]     |
| 86. | RNF167       | 17 | 0 | [5]     |
| 87. | ENO3         | 17 | 0 | [5]     |
| 88. | PFN1         | 17 | 0 | [5]     |
| 89. | C17orf107    | 17 | 0 | [5]     |
| 90. | CHRNE        | 17 | 0 | [5]     |

|      |              |    |        |         |
|------|--------------|----|--------|---------|
| 91.  | INCA1        | 17 | 0      | [5]     |
| 92.  | KIF1C        | 17 | 0      | [5]     |
| 93.  | LPL          | 8  | 0      | [1;3;5] |
| 94.  | MYBPHL       | 1  | 0      | [1]     |
| 95.  | SORT1        | 1  | 0      | [1]     |
| 96.  | SARS         | 1  | 0      | [1]     |
| 97.  | PSRC1        | 1  | 0      | [1]     |
| 98.  | CELSR2       | 1  | 0      | [1]     |
| 99.  | CLASRP       | 19 | 0      | [1;3;5] |
| 100. | ZNF296       | 19 | 0      | [1;3;5] |
| 101. | RELB         | 19 | 0      | [1;3;5] |
| 102. | MTHFD2L      | 4  | 0      | [5]     |
| 103. | CXCL2        | 4  | 0      | [5]     |
| 104. | SLC52A1      | 17 | 0.0064 | [5]     |
| 105. | FCGR2A       | 1  | 0.0063 | [3]     |
| 106. | HSPA6        | 1  | 0.0063 | [3]     |
| 107. | FCGR3A       | 1  | 0.0062 | [3]     |
| 108. | TRNAG8       | 1  | 0.0062 | [3]     |
| 109. | TRNAG31      | 1  | 0.0061 | [3]     |
| 110. | TRNAL6       | 1  | 0.0061 | [3]     |
| 111. | TRNAN14      | 1  | 0.006  | [3]     |
| 112. | ZNF90        | 19 | 0.006  | [1]     |
| 113. | ZNF682       | 19 | 0.0059 | [1]     |
| 114. | FNDC4        | 2  | 0.0058 | [1;4;5] |
| 115. | IFT172       | 2  | 0.0058 | [1;4;5] |
| 116. | GCKR         | 2  | 0.0057 | [1;4;5] |
| 117. | CXCL6        | 4  | 0.0057 | [5]     |
| 118. | CXCL1        | 4  | 0.0056 | [5]     |
| 119. | PF4V1        | 4  | 0.0056 | [5]     |
| 120. | FCGR2C       | 1  | 0.0056 | [3]     |
| 121. | TRNAL3       | 1  | 0.0055 | [3]     |
| 122. | FCGR3B       | 1  | 0.0055 | [3]     |
| 123. | EIF2B4       | 2  | 0.0054 | [1;4;5] |
| 124. | PPM1G        | 2  | 0.0054 | [1;4;5] |
| 125. | ZNF513       | 2  | 0.0053 | [1;4;5] |
| 126. | SNX17        | 2  | 0.0053 | [1;4;5] |
| 127. | KRTCAP3      | 2  | 0.0052 | [1;4;5] |
| 128. | NRBP1        | 2  | 0.0052 | [1;4;5] |
| 129. | GCNT3        | 15 | 0.0052 | [5]     |
| 130. | GTF2A2       | 15 | 0.0051 | [5]     |
| 131. | BCR          | 22 | 0.0051 |         |
| 132. | ABCA1        | 9  | 0.0051 | [1;3;5] |
| 133. | LOC100505624 | 2  | 0.005  | [1;4;5] |
| 134. | GTF3C2       | 2  | 0.005  | [1;4;5] |
| 135. | ACOT11       | 1  | 0.0074 | [1;5]   |
| 136. | FCGR2B       | 1  | 0.0074 | [3]     |

|      |               |    |        |         |
|------|---------------|----|--------|---------|
| 137. | TRNAG25       | 1  | 0.0073 | [3]     |
| 138. | VWA3A         | 16 | 0.0097 |         |
| 139. | EEF2K         | 16 | 0.0096 |         |
| 140. | TRNAL7        | 16 | 0.0095 |         |
| 141. | TMEM59        | 1  | 0.0095 | [1]     |
| 142. | MIR4781       | 1  | 0.0094 | [1]     |
| 143. | LDLRAD1       | 1  | 0.0093 |         |
| 144. | TCEANC2       | 1  | 0.0093 | [1]     |
| 145. | TRNAE5        | 1  | 0.014  | [3]     |
| 146. | TRNAG9        | 1  | 0.014  | [3]     |
| 147. | TRNAD5        | 1  | 0.014  | [3]     |
| 148. | TRNAL14       | 1  | 0.014  | [3]     |
| 149. | IL8           | 4  | 0.013  | [5]     |
| 150. | TRNAG15       | 1  | 0.016  | [3]     |
| 151. | SPC24         | 19 | 0.015  | [1;3;5] |
| 152. | SLC22A24      | 11 | 0.015  |         |
| 153. | SLC22A25      | 11 | 0.015  |         |
| 154. | ANGPTL3       | 1  | 0.017  | [1;3;5] |
| 155. | LOC100507664  | 1  | 0.017  | [1;3;5] |
| 156. | DOCK7         | 1  | 0.017  | [1;3;5] |
| 157. | PINX1         | 8  | 0.023  | [1]     |
| 158. | MIR1322       | 8  | 0.023  | [1]     |
| 159. | FBXO8         | 4  | 0.023  |         |
| 160. | LOC441025     | 4  | 0.04   |         |
| 161. | LOC400756     | 1  | 0.039  | [1;3;5] |
| 162. | LOC647323     | 3  | 0.039  |         |
| 163. | PLD2          | 17 | 0.041  | [5]     |
| 164. | GC            | 4  | 0.069  | [3;5]   |
| 165. | ZNF486        | 19 | 0.069  | [1]     |
| 166. | SPINT4        | 20 | 0.068  | [1;3;5] |
| 167. | MIR3617       | 20 | 0.068  | [1;3;5] |
| 168. | WFDC13        | 20 | 0.067  | [1;3;5] |
| 169. | WFDC10B       | 20 | 0.067  | [1;3;5] |
| 170. | USP1          | 1  | 0.076  | [1;3;5] |
| 171. | SLC10A2       | 13 | 0.076  |         |
| 172. | MINOS1        | 1  | 0.089  |         |
| 173. | C1orf151-NBL1 | 1  | 0.089  |         |
| 174. | TMCO4         | 1  | 0.088  |         |
| 175. | HTR6          | 1  | 0.088  |         |
| 176. | NBL1          | 1  | 0.087  |         |
| 177. | TENM2         | 5  | 0.11   |         |
| 178. | CXCL16        | 17 | 0.1    | [5]     |
| 179. | ZMYND15       | 17 | 0.1    | [5]     |
| 180. | TM4SF5        | 17 | 0.1    | [5]     |
| 181. | GLTPD2        | 17 | 0.1    | [5]     |
| 182. | VMO1          | 17 | 0.1    | [5]     |

|      |              |    |      |         |
|------|--------------|----|------|---------|
| 183. | PSMB6        | 17 | 0.1  | [5]     |
| 184. | EPGN         | 4  | 0.11 | [5]     |
| 185. | C21orf59     | 21 | 0.12 |         |
| 186. | SYNJ1        | 21 | 0.12 |         |
| 187. | TCP10L       | 21 | 0.12 |         |
| 188. | FCRLA        | 1  | 0.12 | [3]     |
| 189. | FCRLB        | 1  | 0.12 | [3]     |
| 190. | SIK3         | 11 | 0.12 | [1;3;5] |
| 191. | TRNAD6       | 1  | 0.13 | [3]     |
| 192. | TRNAL35      | 1  | 0.12 | [3]     |
| 193. | TRNAG17      | 1  | 0.12 | [3]     |
| 194. | TRNAE18      | 1  | 0.12 | [3]     |
| 195. | MIR4286      | 8  | 0.12 | [1]     |
| 196. | C8orf74      | 8  | 0.12 | [1]     |
| 197. | RP1L1        | 8  | 0.12 | [1]     |
| 198. | SOX7         | 8  | 0.12 | [1]     |
| 199. | TRNAL30      | 1  | 0.13 | [3]     |
| 200. | TRNAE13      | 1  | 0.13 | [3]     |
| 201. | TRNAL5       | 1  | 0.13 | [3]     |
| 202. | TRNAD11      | 1  | 0.13 | [3]     |
| 203. | TRNAE22      | 1  | 0.13 | [3]     |
| 204. | TRNAG21      | 1  | 0.13 | [3]     |
| 205. | TRNAG7       | 1  | 0.13 | [3]     |
| 206. | TRNAD18      | 1  | 0.12 | [3]     |
| 207. | TRNAG30      | 1  | 0.12 | [3]     |
| 208. | TRNAG13      | 1  | 0.12 | [3]     |
| 209. | TRNAG23      | 1  | 0.12 | [3]     |
| 210. | TRNAD13      | 1  | 0.12 | [3]     |
| 211. | TRNAL38      | 1  | 0.12 | [3]     |
| 212. | TRNAG24      | 1  | 0.12 | [3]     |
| 213. | NR2F2-AS1    | 15 | 0.12 |         |
| 214. | MIR2467      | 2  | 0.12 |         |
| 215. | LOC100128563 | 2  | 0.12 |         |
| 216. | HDAC4        | 2  | 0.12 |         |
| 217. | VIT          | 2  | 0.12 |         |
| 218. | JPH3         | 16 | 0.12 |         |
| 219. | SP4          | 7  | 0.12 | [1]     |
| 220. | MIR1183      | 7  | 0.12 | [1]     |
| 221. | HAS2-AS1     | 8  | 0.13 |         |
| 222. | DNAH11       | 7  | 0.13 | [1]     |
| 223. | WFDC9        | 20 | 0.13 | [1;3;5] |
| 224. | WFDC11       | 20 | 0.13 | [1;3;5] |
| 225. | WFDC10A      | 20 | 0.13 | [1;3;5] |
| 226. | CR1L         | 1  | 0.14 |         |
| 227. | GATAD2A      | 19 | 0.14 | [1]     |
| 228. | DTD1         | 20 | 0.15 | [2]     |

|      |              |    |      |         |
|------|--------------|----|------|---------|
| 229. | EREG         | 4  | 0.15 | [5]     |
| 230. | GCFC1-AS1    | 21 | 0.15 |         |
| 231. | GCFC1        | 21 | 0.15 |         |
| 232. | C21orf49     | 21 | 0.15 |         |
| 233. | C21orf62     | 21 | 0.15 |         |
| 234. | FLJ46257     | 22 | 0.16 |         |
| 235. | HCG27        | 6  | 0.16 |         |
| 236. | LOC100996357 | 6  | 0.16 |         |
| 237. | HLA-C        | 6  | 0.16 |         |
| 238. | XKR6         | 8  | 0.16 | [1]     |
| 239. | LOC146513    | 16 | 0.18 |         |
| 240. | LOC100506542 | 16 | 0.18 |         |
| 241. | MLXIPL       | 7  | 0.18 | [1;3]   |
| 242. | TBL2         | 7  | 0.18 | [1;3]   |
| 243. | MIR4422      | 1  | 0.18 | [1;3;5] |
| 244. | SCGB2A2      | 11 | 0.21 | [1;3;5] |
| 245. | ASRGL1       | 11 | 0.21 | [1;3;5] |
| 246. | SCGB1D4      | 11 | 0.2  | [1;3;5] |
| 247. | ACOT13       | 6  | 0.2  |         |
| 248. | KIAA0319     | 6  | 0.2  |         |
| 249. | TDP2         | 6  | 0.2  |         |
| 250. | WRN          | 8  | 0.2  |         |
| 251. | CR1          | 1  | 0.21 |         |
| 252. | ALDH1A2      | 15 | 0.21 | [1;3;5] |
| 253. | LOC388796    | 20 | 0.21 |         |
| 254. | SNORA71C     | 20 | 0.21 |         |
| 255. | SNHG11       | 20 | 0.21 |         |
| 256. | LBP          | 20 | 0.21 |         |
| 257. | SNORA39      | 20 | 0.21 |         |
| 258. | SNORA71B     | 20 | 0.21 |         |
| 259. | SNORA71D     | 20 | 0.21 |         |
| 260. | SNORA60      | 20 | 0.21 |         |
| 261. | SNORA71A     | 20 | 0.21 |         |
| 262. | ENAM         | 4  | 0.23 |         |
| 263. | AMBN         | 4  | 0.23 |         |
| 264. | INTS4        | 11 | 0.23 |         |
| 265. | WFDC8        | 20 | 0.23 | [1;3;5] |
| 266. | EPPIN-WFDC6  | 20 | 0.23 | [1;3;5] |
| 267. | EPPIN        | 20 | 0.23 | [1;3;5] |
| 268. | BCL7B        | 7  | 0.23 | [1;3]   |
| 269. | ABCA4        | 1  | 0.23 |         |
| 270. | PPP1R3B      | 8  | 0.23 | [1;5]   |
| 271. | SIDT2        | 11 | 0.23 | [1;3;5] |
| 272. | PAFAH1B2     | 11 | 0.23 | [1;3;5] |
| 273. | VPS37D       | 7  | 0.23 | [1;3]   |
| 274. | BNIP2        | 15 | 0.24 | [5]     |

|      |              |    |      |         |
|------|--------------|----|------|---------|
| 275. | LOC101059966 | 8  | 0.24 | [1]     |
| 276. | MTUS1        | 8  | 0.24 | [1]     |
| 277. | DUSP12       | 1  | 0.24 | [3]     |
| 278. | RASGRF2      | 5  | 0.24 |         |
| 279. | CRTC1        | 19 | 0.24 | [1]     |
| 280. | COMP         | 19 | 0.24 | [1]     |
| 281. | UPF1         | 19 | 0.24 | [1]     |
| 282. | AMTN         | 4  | 0.24 |         |
| 283. | OR13C8       | 9  | 0.24 | [1;3;5] |
| 284. | OR13C2       | 9  | 0.24 | [1;3;5] |
| 285. | OR13C5       | 9  | 0.24 | [1;3;5] |
| 286. | OR13C9       | 9  | 0.24 | [1;3;5] |
| 287. | MFHAS1       | 8  | 0.24 | [1;5]   |
| 288. | CLDN23       | 8  | 0.24 | [1;5]   |
| 289. | GPRC5C       | 17 | 0.24 |         |
| 290. | CD300A       | 17 | 0.24 |         |
| 291. | TRNAN32      | 1  | 0.24 | [3]     |
| 292. | TRNAE23      | 1  | 0.24 | [3]     |
| 293. | TRNAV29      | 1  | 0.23 | [3]     |
| 294. | TAGLN        | 11 | 0.24 | [1;3;5] |
| 295. | LOC100652768 | 11 | 0.24 | [1;3;5] |
| 296. | ANKRD31      | 5  | 0.24 | [1]     |
| 297. | MIR640       | 19 | 0.24 | [1]     |
| 298. | WFDC2        | 20 | 0.25 | [1;3;5] |
| 299. | WFDC6        | 20 | 0.25 | [1;3;5] |
| 300. | SPINT3       | 20 | 0.25 | [1;3;5] |
| 301. | C2orf43      | 2  | 0.25 | [1;5]   |
| 302. | MIS18A       | 21 | 0.26 |         |
| 303. | TP53RK       | 20 | 0.26 | [1;3;5] |
| 304. | SLC2A10      | 20 | 0.26 | [1;3;5] |
| 305. | SLC13A3      | 20 | 0.26 | [1;3;5] |
| 306. | FAM13A       | 4  | 0.26 | [2;4;5] |
| 307. | FAM48A       | 13 | 0.26 |         |
| 308. | CSNK1A1L     | 13 | 0.26 |         |
| 309. | LINC00578    | 3  | 0.25 |         |
| 310. | SDR39U1      | 14 | 0.26 | [1]     |
| 311. | KHNYN        | 14 | 0.26 | [1]     |
| 312. | NYNRIN       | 14 | 0.26 | [1]     |
| 313. | CBLN3        | 14 | 0.26 | [1]     |
| 314. | ITGB3        | 17 | 0.26 | [1]     |
| 315. | EFCAB13      | 17 | 0.26 | [1]     |
| 316. | MYZAP        | 15 | 0.25 | [1;3;5] |
| 317. | GCOM1        | 15 | 0.25 | [1;3;5] |
| 318. | SMR3A        | 4  | 0.25 |         |
| 319. | CABS1        | 4  | 0.25 |         |
| 320. | PROL1        | 4  | 0.25 |         |

|      |               |    |      |       |
|------|---------------|----|------|-------|
| 321. | SMR3B         | 4  | 0.25 |       |
| 322. | LOC400548     | 16 | 0.25 |       |
| 323. | FAM92B        | 16 | 0.25 |       |
| 324. | KIAA0513      | 16 | 0.25 |       |
| 325. | CTIF          | 18 | 0.25 | [1;3] |
| 326. | MIR4743       | 18 | 0.25 | [1;3] |
| 327. | WWC1          | 5  | 0.25 |       |
| 328. | LOC101060138  | 7  | 0.25 | [2]   |
| 329. | ZNF853        | 7  | 0.25 | [2]   |
| 330. | C7orf26       | 7  | 0.25 | [2]   |
| 331. | ZNF316        | 7  | 0.25 | [2]   |
| 332. | ZDHHC4        | 7  | 0.25 | [2]   |
| 333. | EAF2          | 3  | 0.25 |       |
| 334. | IQCB1         | 3  | 0.25 |       |
| 335. | GOLGB1        | 3  | 0.25 |       |
| 336. | LOC100996519  | 8  | 0.25 | [1]   |
| 337. | CDC27         | 17 | 0.25 | [1]   |
| 338. | AUTS2         | 7  | 0.25 |       |
| 339. | RNU6-1        | 15 | 0.25 |       |
| 340. | MAP2K5        | 15 | 0.25 |       |
| 341. | SKOR1         | 15 | 0.25 |       |
| 342. | SEC23B        | 20 | 0.25 | [2]   |
| 343. | LINC00493     | 20 | 0.25 | [2]   |
| 344. | ERI1          | 8  | 0.25 | [1;5] |
| 345. | MIR4660       | 8  | 0.25 | [1;5] |
| 346. | LINC00599     | 8  | 0.25 | [1;5] |
| 347. | MIR124-1      | 8  | 0.25 | [1;5] |
| 348. | LINC00639     | 14 | 0.25 |       |
| 349. | HAS2          | 8  | 0.26 |       |
| 350. | HAND2         | 4  | 0.27 |       |
| 351. | NBLA00301     | 4  | 0.27 |       |
| 352. | AREG          | 4  | 0.27 | [5]   |
| 353. | SLC14A2       | 18 | 0.27 |       |
| 354. | KCTD14        | 11 | 0.27 |       |
| 355. | NDUFC2-KCTD14 | 11 | 0.27 |       |
| 356. | CNBD1         | 8  | 0.27 |       |
| 357. | NELL1         | 11 | 0.27 |       |
| 358. | LRRC4C        | 11 | 0.27 |       |
| 359. | CAND1         | 12 | 0.28 |       |
| 360. | MIR1297       | 13 | 0.29 |       |
| 361. | BAZ1B         | 7  | 0.29 | [1;3] |
| 362. | MIR4695       | 1  | 0.29 |       |
| 363. | ALDH4A1       | 1  | 0.29 |       |
| 364. | MIR1290       | 1  | 0.29 |       |
| 365. | TAS1R2        | 1  | 0.28 |       |
| 366. | IFFO2         | 1  | 0.28 |       |

|      |              |    |      |         |
|------|--------------|----|------|---------|
| 367. | NDUFA13      | 19 | 0.29 | [1]     |
| 368. | TSSK6        | 19 | 0.29 | [1]     |
| 369. | TTC29        | 4  | 0.29 |         |
| 370. | FLJ45256     | 16 | 0.29 |         |
| 371. | TNRC6A       | 16 | 0.29 |         |
| 372. | ALDH5A1      | 6  | 0.29 |         |
| 373. | NRXN3        | 14 | 0.29 |         |
| 374. | MT3          | 16 | 0.29 | [1;3;5] |
| 375. | MT2A         | 16 | 0.29 | [1;3;5] |
| 376. | BBS2         | 16 | 0.29 | [1;3;5] |
| 377. | MT4          | 16 | 0.29 | [1;3;5] |
| 378. | PLSCR1       | 3  | 0.28 |         |
| 379. | PLSCR2       | 3  | 0.28 |         |
| 380. | GGA1         | 22 | 0.28 | [1]     |
| 381. | SH3BP1       | 22 | 0.28 | [1]     |
| 382. | PDXP         | 22 | 0.28 | [1]     |
| 383. | LGALS1       | 22 | 0.28 | [1]     |
| 384. | NOL12        | 22 | 0.28 | [1]     |
| 385. | LIPG         | 18 | 0.28 | [1;3]   |
| 386. | AHNAK        | 11 | 0.28 | [1;3;5] |
| 387. | SCGB1A1      | 11 | 0.28 | [1;3;5] |
| 388. | RSF1         | 11 | 0.28 |         |
| 389. | GPAM         | 10 | 0.28 | [1]     |
| 390. | CDCA7L       | 7  | 0.28 | [1]     |
| 391. | PURG         | 8  | 0.28 |         |
| 392. | ERC2         | 3  | 0.28 |         |
| 393. | SKAP1        | 17 | 0.28 | [1]     |
| 394. | AKT2         | 19 | 0.28 |         |
| 395. | C19orf47     | 19 | 0.28 |         |
| 396. | MIR641       | 19 | 0.28 |         |
| 397. | LOC100507646 | 19 | 0.28 |         |
| 398. | PUS7         | 7  | 0.28 |         |
| 399. | SRPK2        | 7  | 0.28 |         |
| 400. | FLVCR1       | 1  | 0.28 |         |
| 401. | FLVCR1-AS1   | 1  | 0.28 |         |
| 402. | TATDN3       | 1  | 0.28 |         |
| 403. | NSL1         | 1  | 0.27 |         |
| 404. | C1orf227     | 1  | 0.27 |         |
| 405. | BATF3        | 1  | 0.27 |         |
| 406. | PBX4         | 19 | 0.27 | [1]     |
| 407. | GMIP         | 19 | 0.27 | [1]     |
| 408. | LPAR2        | 19 | 0.27 | [1]     |
| 409. | CILP2        | 19 | 0.27 | [1]     |
| 410. | PTPRM        | 18 | 0.27 |         |
| 411. | MUC22        | 6  | 0.27 | [3]     |
| 412. | MUC21        | 6  | 0.27 | [3]     |

|      |              |    |      |         |
|------|--------------|----|------|---------|
| 413. | HCG22        | 6  | 0.27 |         |
| 414. | BCAS1        | 20 | 0.27 |         |
| 415. | ZNF180       | 19 | 0.27 | [1;3;5] |
| 416. | CEACAM20     | 19 | 0.27 | [1;3;5] |
| 417. | HNRNPM       | 19 | 0.27 | [1]     |
| 418. | MARCH2       | 19 | 0.27 | [1]     |
| 419. | RAB11B       | 19 | 0.27 | [1]     |
| 420. | MIR4999      | 19 | 0.27 | [1]     |
| 421. | RAB11B-AS1   | 19 | 0.27 | [1]     |
| 422. | RARS         | 5  | 0.27 |         |
| 423. | MIR103B1     | 5  | 0.27 |         |
| 424. | PANK3        | 5  | 0.27 |         |
| 425. | MIR103A1     | 5  | 0.27 |         |
| 426. | INTS10       | 8  | 0.27 | [1;3;5] |
| 427. | TRNAL11      | 16 | 0.27 | [1;3;5] |
| 428. | TRNAL13      | 16 | 0.27 | [1;3;5] |
| 429. | ARL2BP       | 16 | 0.27 | [1;3;5] |
| 430. | PLLP         | 16 | 0.27 | [1;3;5] |
| 431. | RSPRY1       | 16 | 0.27 | [1;3;5] |
| 432. | ATP13A1      | 19 | 0.27 | [1]     |
| 433. | C2orf16      | 2  | 0.27 | [1;4;5] |
| 434. | MACROD2      | 20 | 0.27 |         |
| 435. | PDE11A       | 2  | 0.27 |         |
| 436. | NPAS3        | 14 | 0.27 |         |
| 437. | PELI2        | 14 | 0.27 |         |
| 438. | TRPM3        | 9  | 0.27 |         |
| 439. | YJEFN3       | 19 | 0.27 | [1]     |
| 440. | ITGB8        | 7  | 0.27 |         |
| 441. | PHACTR4      | 1  | 0.27 |         |
| 442. | SLC28A1      | 15 | 0.28 |         |
| 443. | PDE8A        | 15 | 0.27 |         |
| 444. | FAM190A      | 4  | 0.27 |         |
| 445. | ATG10        | 5  | 0.28 |         |
| 446. | NUP93        | 16 | 0.28 | [1;3;5] |
| 447. | GDNF-AS1     | 5  | 0.28 |         |
| 448. | ZNF365       | 10 | 0.28 | [1]     |
| 449. | LOC100506207 | 6  | 0.29 |         |
| 450. | LOC100506091 | 6  | 0.29 |         |
| 451. | SLC35B3      | 6  | 0.29 |         |
| 452. | LOC100996353 | 16 | 0.29 | [1;3;5] |
| 453. | MT1X         | 16 | 0.29 | [1;3;5] |
| 454. | PCSK7        | 11 | 0.29 | [1;3;5] |
| 455. | RNF214       | 11 | 0.29 | [1;3;5] |
| 456. | THSD7B       | 2  | 0.29 |         |
| 457. | SLC46A3      | 13 | 0.29 |         |
| 458. | RNU6-53      | 13 | 0.28 |         |

|      |              |    |      |         |
|------|--------------|----|------|---------|
| 459. | POMP         | 13 | 0.28 |         |
| 460. | EFHA1        | 13 | 0.28 |         |
| 461. | RNU6-59      | 13 | 0.28 |         |
| 462. | LOC255654    | 1  | 0.28 |         |
| 463. | SMYD3        | 1  | 0.28 |         |
| 464. | ACVR1        | 2  | 0.28 |         |
| 465. | MED18        | 1  | 0.28 |         |
| 466. | MSRA         | 8  | 0.28 | [1;5]   |
| 467. | TBL1XR1      | 3  | 0.28 |         |
| 468. | COG5         | 7  | 0.29 |         |
| 469. | PQLC2        | 1  | 0.29 |         |
| 470. | MRTO4        | 1  | 0.29 |         |
| 471. | EMC1         | 1  | 0.29 |         |
| 472. | AKR7A3       | 1  | 0.29 |         |
| 473. | LOC100506730 | 1  | 0.29 |         |
| 474. | AKR7A2       | 1  | 0.29 |         |
| 475. | UNC13C       | 15 | 0.29 |         |
| 476. | MOB3B        | 9  | 0.29 |         |
| 477. | LINC00032    | 9  | 0.29 |         |
| 478. | EQTN         | 9  | 0.29 |         |
| 479. | BTC          | 4  | 0.28 | [5]     |
| 480. | SLC35F1      | 6  | 0.28 |         |
| 481. | ZNF385B      | 2  | 0.29 |         |
| 482. | MIR1258      | 2  | 0.28 |         |
| 483. | CWC22        | 2  | 0.28 |         |
| 484. | PRTFDC1      | 10 | 0.28 |         |
| 485. | LOC439994    | 10 | 0.3  |         |
| 486. | FAM22D       | 10 | 0.3  |         |
| 487. | LOC728190    | 10 | 0.3  |         |
| 488. | FLJ45974     | 7  | 0.3  |         |
| 489. | SCGB1D2      | 11 | 0.3  | [1;3;5] |
| 490. | LOC339874    | 3  | 0.3  |         |
| 491. | NUDT16       | 3  | 0.3  |         |
| 492. | SLIT3        | 5  | 0.3  |         |
| 493. | URB1         | 21 | 0.3  |         |
| 494. | MRAP         | 21 | 0.3  |         |
| 495. | TULP4        | 6  | 0.3  |         |
| 496. | GRXCR2       | 5  | 0.3  |         |
| 497. | SH3RF2       | 5  | 0.3  |         |
| 498. | CGNL1        | 15 | 0.3  | [1;3;5] |
| 499. | CC2D2A       | 4  | 0.3  |         |
| 500. | FBXL5        | 4  | 0.3  |         |
| 501. | NEDD4L       | 18 | 0.3  |         |
| 502. | SLC30A10     | 1  | 0.31 | [1]     |
| 503. | EPRS         | 1  | 0.31 | [1]     |
| 504. | AAMDC        | 11 | 0.31 |         |

|      |                  |    |      |         |
|------|------------------|----|------|---------|
| 505. | GDF7             | 2  | 0.31 | [1;5]   |
| 506. | HS1BP3           | 2  | 0.31 | [1;5]   |
| 507. | NR1D2            | 3  | 0.32 |         |
| 508. | DSCR4            | 21 | 0.31 |         |
| 509. | LOC728218        | 10 | 0.32 |         |
| 510. | NOX3             | 6  | 0.32 |         |
| 511. | CCRL1            | 3  | 0.32 | [2]     |
| 512. | NPHP3-ACAD11     | 3  | 0.32 | [2]     |
| 513. | ACAD11           | 3  | 0.32 | [2]     |
| 514. | DNAJC13          | 3  | 0.31 | [2]     |
| 515. | MAFK             | 7  | 0.33 | [2]     |
| 516. | LOC100128653     | 7  | 0.33 | [2]     |
| 517. | TMEM184A         | 7  | 0.32 | [2]     |
| 518. | INTS1            | 7  | 0.32 | [2]     |
| 519. | LOC100996269     | 7  | 0.32 | [2]     |
| 520. | SLC18A1          | 8  | 0.34 | [1;3;5] |
| 521. | C15orf53         | 15 | 0.33 |         |
| 522. | LNX1-AS2         | 4  | 0.34 |         |
| 523. | LNX1             | 4  | 0.33 |         |
| 524. | LINC00540        | 13 | 0.34 |         |
| 525. | WNT3             | 17 | 0.33 | [1]     |
| 526. | NSF              | 17 | 0.33 | [1]     |
| 527. | UBXN8            | 8  | 0.33 |         |
| 528. | GSR              | 8  | 0.33 |         |
| 529. | FAM192A          | 16 | 0.34 | [1;3;5] |
| 530. | PCYT1A           | 3  | 0.34 |         |
| 531. | UBXN7            | 3  | 0.33 |         |
| 532. | TM4SF19-TCTEX1D2 | 3  | 0.33 |         |
| 533. | TCTEX1D2         | 3  | 0.33 |         |
| 534. | TM4SF19          | 3  | 0.33 |         |
| 535. | ROR2             | 9  | 0.33 |         |
| 536. | RAB3IL1          | 11 | 0.33 | [1;3;5] |
| 537. | FADS2            | 11 | 0.33 | [1;3;5] |
| 538. | FADS3            | 11 | 0.33 | [1;3;5] |
| 539. | MIR1908          | 11 | 0.33 | [1;3;5] |
| 540. | FADS1            | 11 | 0.33 | [1;3;5] |
| 541. | MYL4             | 17 | 0.33 | [1]     |
| 542. | FHIT             | 3  | 0.34 |         |
| 543. | LOC100996319     | 5  | 0.34 | [1]     |
| 544. | ADAMTS1          | 21 | 0.34 |         |
| 545. | PSMG3            | 7  | 0.34 | [2]     |
| 546. | C14orf1          | 14 | 0.34 |         |
| 547. | FLVCR2           | 14 | 0.34 |         |
| 548. | TLL5             | 14 | 0.34 |         |
| 549. | KCNS3            | 2  | 0.34 |         |
| 550. | GPLD1            | 6  | 0.34 |         |

|      |              |    |      |         |
|------|--------------|----|------|---------|
| 551. | PSD3         | 8  | 0.34 | [1;5]   |
| 552. | LOC339298    | 18 | 0.34 |         |
| 553. | LOC100996623 | 4  | 0.35 |         |
| 554. | EMID2        | 7  | 0.34 |         |
| 555. | BCL3         | 19 | 0.35 | [1;3;5] |
| 556. | CEACAM16     | 19 | 0.35 | [1;3;5] |
| 557. | TIGD3        | 11 | 0.35 | [2]     |
| 558. | CDC42EP2     | 11 | 0.35 | [2]     |
| 559. | DPF2         | 11 | 0.35 | [2]     |
| 560. | POLA2        | 11 | 0.35 | [2]     |
| 561. | DCDC2        | 6  | 0.35 |         |
| 562. | MRS2         | 6  | 0.35 |         |
| 563. | SVIL         | 10 | 0.35 |         |
| 564. | LPIN1        | 2  | 0.35 |         |
| 565. | NTSR2        | 2  | 0.35 |         |
| 566. | LOC100506405 | 2  | 0.35 |         |
| 567. | GREB1        | 2  | 0.35 |         |
| 568. | SNTA1        | 20 | 0.35 |         |
| 569. | CDK5RAP1     | 20 | 0.35 |         |
| 570. | DISC2        | 1  | 0.35 |         |
| 571. | TSNAX-DISC1  | 1  | 0.35 |         |
| 572. | DISC1        | 1  | 0.35 |         |
| 573. | GZMK         | 5  | 0.35 |         |
| 574. | ESM1         | 5  | 0.35 | [1]     |
| 575. | OR13C4       | 9  | 0.35 | [1;3;5] |
| 576. | OR13F1       | 9  | 0.35 | [1;3;5] |
| 577. | OR13C3       | 9  | 0.35 | [1;3;5] |
| 578. | ANXA2        | 15 | 0.35 |         |
| 579. | NARG2        | 15 | 0.35 |         |
| 580. | EPHA6        | 3  | 0.35 |         |
| 581. | TCEA1        | 8  | 0.35 | [2]     |
| 582. | RGS20        | 8  | 0.35 | [2]     |
| 583. | BEST1        | 11 | 0.36 | [1;3;5] |
| 584. | FEN1         | 11 | 0.36 | [1;3;5] |
| 585. | LOC100129473 | 11 | 0.36 | [1;3;5] |
| 586. | C11orf9      | 11 | 0.36 | [1;3;5] |
| 587. | C11orf10     | 11 | 0.36 | [1;3;5] |
| 588. | MIR611       | 11 | 0.36 | [1;3;5] |
| 589. | TRPS1        | 8  | 0.36 | [1]     |
| 590. | OR13D1       | 9  | 0.36 | [1;3;5] |
| 591. | DAO          | 12 | 0.36 | [1]     |
| 592. | SVOP         | 12 | 0.36 | [1]     |
| 593. | SNHG3        | 1  | 0.37 |         |
| 594. | RCC1         | 1  | 0.37 |         |
| 595. | SNORA73A     | 1  | 0.36 |         |
| 596. | RNU105A      | 1  | 0.36 |         |

|      |              |    |      |           |
|------|--------------|----|------|-----------|
| 597. | GPC6         | 13 | 0.36 |           |
| 598. | EFR3B        | 2  | 0.36 |           |
| 599. | POMC         | 2  | 0.36 |           |
| 600. | TET1         | 10 | 0.36 |           |
| 601. | MIR1254-1    | 10 | 0.36 |           |
| 602. | SNORD98      | 10 | 0.36 |           |
| 603. | CCAR1        | 10 | 0.36 |           |
| 604. | DKFZP434K028 | 11 | 0.37 | [1;3;5]   |
| 605. | DMRT1        | 9  | 0.37 |           |
| 606. | DMRT3        | 9  | 0.37 |           |
| 607. | SLC22A20     | 11 | 0.38 | [2]       |
| 608. | CLLU1OS      | 12 | 0.38 |           |
| 609. | CLLU1        | 12 | 0.37 |           |
| 610. | GOSR2        | 17 | 0.38 | [1]       |
| 611. | MIR5089      | 17 | 0.38 | [1]       |
| 612. | RPRML        | 17 | 0.38 | [1]       |
| 613. | GRIN2A       | 16 | 0.38 |           |
| 614. | C4orf40      | 4  | 0.38 |           |
| 615. | DDX21        | 10 | 0.38 |           |
| 616. | DDX50        | 10 | 0.38 |           |
| 617. | STOX1        | 10 | 0.37 |           |
| 618. | DSCAML1      | 11 | 0.38 | [1;2;3;5] |
| 619. | DRAM1        | 12 | 0.38 |           |
| 620. | OPCML        | 11 | 0.38 |           |
| 621. | ZNF14        | 19 | 0.38 | [1]       |
| 622. | ZNF101       | 19 | 0.38 | [1]       |
| 623. | CYP1A2       | 15 | 0.38 |           |
| 624. | CYP1A1       | 15 | 0.38 |           |
| 625. | MIR4513      | 15 | 0.38 |           |
| 626. | CSK          | 15 | 0.38 |           |
| 627. | LMAN1L       | 15 | 0.38 |           |
| 628. | COL4A3BP     | 5  | 0.38 | [1]       |
| 629. | HMGCR        | 5  | 0.38 | [1]       |
| 630. | TMC1         | 9  | 0.39 |           |
| 631. | FAM200B      | 4  | 0.39 |           |
| 632. | MIR5197      | 5  | 0.39 |           |
| 633. | MIR1294      | 5  | 0.39 |           |
| 634. | GALNT10      | 5  | 0.39 |           |
| 635. | TIGD2        | 4  | 0.39 | [2;4;5]   |
| 636. | LOC731282    | 4  | 0.39 | [2;4;5]   |
| 637. | MRGPRF       | 11 | 0.39 | [3]       |
| 638. | TPCN2        | 11 | 0.39 | [3]       |
| 639. | MIR3164      | 11 | 0.39 | [3]       |
| 640. | SPINK5       | 5  | 0.39 |           |
| 641. | C19orf38     | 19 | 0.39 | [1;3;5]   |
| 642. | MIR199A1     | 19 | 0.39 | [1;3;5]   |

|      |             |    |      |         |
|------|-------------|----|------|---------|
| 643. | CARM1       | 19 | 0.39 | [1;3;5] |
| 644. | TMED1       | 19 | 0.39 | [1;3;5] |
| 645. | DNM2        | 19 | 0.39 | [1;3;5] |
| 646. | SLITRK5     | 13 | 0.39 |         |
| 647. | C4orf22     | 4  | 0.39 |         |
| 648. | CDC42EP1    | 22 | 0.39 | [1]     |
| 649. | LGALS2      | 22 | 0.39 | [1]     |
| 650. | DNAJC27-AS1 | 2  | 0.39 |         |
| 651. | DNAJC27     | 2  | 0.39 |         |

**Supplementary Table 8: Genes with FDR=0.4 from the sparse CCA method**

| Rank | Gene         | Chr | q_val  | Ref     |
|------|--------------|-----|--------|---------|
| 1.   | LIPC         | 15  | 0      | [1;3;5] |
| 2.   | PPP1R11      | 6   | 0      | [3]     |
| 3.   | RNF39        | 6   | 0      | [3]     |
| 4.   | ADAM10       | 15  | 0      | [1;3;5] |
| 5.   | ZNRD1-AS1    | 6   | 0      | [3]     |
| 6.   | PCIF1        | 20  | 0      | [1;3;5] |
| 7.   | SLC12A3      | 16  | 0      | [1;3;5] |
| 8.   | ZNF335       | 20  | 0      | [1;3;5] |
| 9.   | HCG8         | 6   | 0      | [3]     |
| 10.  | CETP         | 16  | 0      | [1;3;5] |
| 11.  | HERPUD1      | 16  | 0      | [1;3;5] |
| 12.  | FAM63B       | 15  | 0      | [1;3;5] |
| 13.  | ZNRD1        | 6   | 0      | [3]     |
| 14.  | PVRL2        | 19  | 0      | [1;3;5] |
| 15.  | MYO1E        | 15  | 0      | [1;3;5] |
| 16.  | TOMM40       | 19  | 0      | [1;3;5] |
| 17.  | SLTM         | 15  | 0      | [1;3;5] |
| 18.  | APOC1        | 19  | 0      | [1;3;5] |
| 19.  | PLTP         | 20  | 0      | [1;3;5] |
| 20.  | LDHAL6B      | 15  | 0      | [1;3;5] |
| 21.  | ZSWIM1       | 20  | 0      | [1;3;5] |
| 22.  | NEURL2       | 20  | 0      | [1;3;5] |
| 23.  | SPATA25      | 20  | 0      | [1;3;5] |
| 24.  | CTSA         | 20  | 0      | [1;3;5] |
| 25.  | CCNB2        | 15  | 0      | [1;3;5] |
| 26.  | ZSWIM3       | 20  | 0      | [1;3;5] |
| 27.  | RNF111       | 15  | 0      | [1;3;5] |
| 28.  | ACOT8        | 20  | 0      | [1;3;5] |
| 29.  | MIR2116      | 15  | 0      | [1;3;5] |
| 30.  | USP24        | 1   | 0      | [1;3;5] |
| 31.  | LOC100128028 | 20  | 0      | [1;3;5] |
| 32.  | APOA4        | 11  | 0      | [1;3;5] |
| 33.  | APOA5        | 11  | 0      | [1;3;5] |
| 34.  | BUD13        | 11  | 0      | [1;3;5] |
| 35.  | FAM81A       | 15  | 0      | [5]     |
| 36.  | MMP9         | 20  | 0      | [1;3;5] |
| 37.  | ZNF259       | 11  | 0      | [1;3;5] |
| 38.  | DPP6         | 7   | 0.0088 |         |
| 39.  | NLRC5        | 16  | 0.0085 | [1;3;5] |
| 40.  | LOC100507634 | 1   | 0.0083 | [1;3;5] |
| 41.  | APOB         | 2   | 0.0081 | [1;5]   |
| 42.  | APOC3        | 11  | 0.016  | [1;3;5] |
| 43.  | IDO1         | 8   | 0.016  |         |
| 44.  | CBLC         | 19  | 0.015  | [1;3;5] |

|     |              |    |       |         |
|-----|--------------|----|-------|---------|
| 45. | MSI2         | 17 | 0.03  |         |
| 46. | CGNL1        | 15 | 0.051 | [1;3;5] |
| 47. | CACNA2D3     | 3  | 0.05  |         |
| 48. | LPA          | 6  | 0.049 | [1]     |
| 49. | BCAM         | 19 | 0.095 | [1;3;5] |
| 50. | DAB1         | 1  | 0.1   |         |
| 51. | CDH13        | 16 | 0.11  |         |
| 52. | MIR3646      | 20 | 0.11  | [1]     |
| 53. | CHST11       | 12 | 0.11  |         |
| 54. | ANO4         | 12 | 0.14  |         |
| 55. | APOA1        | 11 | 0.15  | [1;3;5] |
| 56. | LOC400940    | 2  | 0.15  |         |
| 57. | DLGAP1       | 18 | 0.15  |         |
| 58. | MBOAT1       | 6  | 0.16  |         |
| 59. | SLC12A5      | 20 | 0.15  | [1;3;5] |
| 60. | PRKCE        | 2  | 0.17  |         |
| 61. | RBFOX1       | 16 | 0.18  |         |
| 62. | GRIK2        | 6  | 0.18  |         |
| 63. | RIN3         | 14 | 0.19  |         |
| 64. | CNTLN        | 9  | 0.2   |         |
| 65. | KCNIP1       | 5  | 0.19  |         |
| 66. | LARGE        | 22 | 0.19  |         |
| 67. | AQP9         | 15 | 0.21  | [1;3;5] |
| 68. | ATXN1        | 6  | 0.22  | [1]     |
| 69. | PACRG        | 6  | 0.21  |         |
| 70. | BSND         | 1  | 0.21  | [1;3;5] |
| 71. | PCSK9        | 1  | 0.22  | [1;3;5] |
| 72. | LDLR         | 19 | 0.22  | [1;3;5] |
| 73. | ARID5B       | 10 | 0.22  |         |
| 74. | ATP10A       | 15 | 0.22  |         |
| 75. | LOC100996353 | 16 | 0.21  | [1;3;5] |
| 76. | ADAMTS3      | 4  | 0.21  | [3;5]   |
| 77. | CSMD1        | 8  | 0.21  |         |
| 78. | PEX13        | 2  | 0.22  |         |
| 79. | FHIT         | 3  | 0.22  |         |
| 80. | NUP93        | 16 | 0.25  | [1;3;5] |
| 81. | MIR605       | 10 | 0.26  |         |
| 82. | ZBTB4        | 17 | 0.25  | [2;4]   |
| 83. | SNORA29      | 6  | 0.29  | [1]     |
| 84. | DIO2         | 14 | 0.29  |         |
| 85. | SLIT3        | 5  | 0.29  |         |
| 86. | MEIS2        | 15 | 0.3   |         |
| 87. | TENM2        | 5  | 0.3   |         |
| 88. | LOC729852    | 7  | 0.3   |         |
| 89. | WWOX         | 16 | 0.3   |         |
| 90. | SNORA20      | 6  | 0.3   | [1]     |

|      |              |    |      |         |
|------|--------------|----|------|---------|
| 91.  | KIRREL3      | 11 | 0.3  | [1]     |
| 92.  | ATXN7L1      | 7  | 0.3  |         |
| 93.  | NTN1         | 17 | 0.3  |         |
| 94.  | POLR3G       | 5  | 0.31 |         |
| 95.  | FADS3        | 11 | 0.33 | [1;3;5] |
| 96.  | FADS2        | 11 | 0.33 | [1;3;5] |
| 97.  | CEACAM16     | 19 | 0.33 | [1;3;5] |
| 98.  | SSBP2        | 5  | 0.35 |         |
| 99.  | ACCS         | 11 | 0.34 |         |
| 100. | DCP2         | 5  | 0.34 |         |
| 101. | LOC100507652 | 1  | 0.34 | [1;3;5] |
| 102. | PSMD6        | 3  | 0.34 |         |
| 103. | SLC14A2      | 18 | 0.34 |         |
| 104. | FHL2         | 2  | 0.35 |         |
| 105. | PSMD6-AS2    | 3  | 0.36 |         |
| 106. | PARD3B       | 2  | 0.35 |         |
| 107. | MIR153-2     | 7  | 0.35 |         |
| 108. | LOC100505718 | 8  | 0.35 |         |
| 109. | KLHL29       | 2  | 0.35 |         |
| 110. | LPHN3        | 4  | 0.35 |         |
| 111. | TBC1D22A     | 22 | 0.37 | [2]     |
| 112. | FADS1        | 11 | 0.37 | [1;3;5] |
| 113. | MIR1908      | 11 | 0.37 | [1;3;5] |
| 114. | AIG1         | 6  | 0.37 |         |
| 115. | CEP70        | 3  | 0.37 |         |
| 116. | CPQ          | 8  | 0.37 |         |
| 117. | OPCML        | 11 | 0.39 |         |
